# Supplementary material
Source: PubMed Central journal article supplement (PMC3065653)
Supplement: NIHMS241426-supplement-1_si_001.pdf [file NIHMS241426-supplement-1_si_001.pdf]

## Supplementary material

### <sup>15</sup>N ethanolamine tagging procedure

3  $\mu\text{L}$  <sup>15</sup>N-ethanolamine (50  $\mu\text{mol}$ ) was added to the sample, the pH adjusted to 7.0 with 1 M HCl and DMT-MM (21 mg) was added to initiate the reaction<sup>1,2</sup>. The mixture was continuously stirred at room temperature for 4 hrs to complete the reaction. The pH was then adjusted to 5.0 by adding 1 M HCl or NaOH and the solutions were diluted to 600  $\mu\text{L}$  by adding water or D<sub>2</sub>O prior to detection by <sup>1</sup>H-<sup>15</sup>N 2D NMR.<sup>3,4</sup>

### <sup>13</sup>C -formic acid tagging procedure

2  $\mu\text{L}$  of <sup>13</sup>C-formic acid (0.05 mmol) and 5 mg of N-hydroxysuccinimide (0.04 mmol) were dissolved in 100  $\mu\text{L}$  tetrahydrofuran. Nine mg of N, N-dicyclohexylcarbodiimide (0.04 mmol) in 50  $\mu\text{L}$  tetrahydrofuran was added to the mixture and stirred at room temperature.<sup>5</sup> After 15 min, the reaction mixture was centrifuged to remove insoluble urea; the supernatant containing <sup>13</sup>C-N-formyloxysuccinimide was then added to the mixture of synthetic analogues of the metabolites along with 50  $\mu\text{L}$  of 2 M NaHCO<sub>3</sub> (0.1 mmol) aqueous solution. The reaction was stirred at room temperature for 4 h and dried under vacuum. The residue was redispersed in 500  $\mu\text{L}$  D<sub>2</sub>O, the pH was adjusted to 7.0 by adding 1M HCl and then transferred to a standard 5mm NMR tube for analysis using <sup>1</sup>H-<sup>13</sup>C 2D NMR.<sup>6</sup>

1. Kunishima, M.; Kawachi, C.; Morita, J.; Terao, K.; Iwasaki, F.; Tani, S. *Tetrahedron* **1999**, 55, 13159-13170.
2. Kunishima, M.; Kawachi, C.; Hioki, K.; Terao, R.; Tani, S. *Tetrahedron* **2001**, 57, 1551-1558.
3. Zhang, Y. Z.; Paterson, Y.; Roder, H. *Protein Sci.* **1995**, 4, 804-814.
4. Ye, T.; Mo, H.; Shanaiah, N.; Nagana Gowda, G. A.; Zhang, S.; Raftery, D. *Anal. Chem.* **2009**, 81(12), 4882-4888.
5. Hecht, S. M.; Werner, D. *J. Chem. Soc. Perkin Trans. 1*, **1973**, 1903-1906.
6. Ye, T.; Zhang, S.; Mo, H.; Tayyari, F.; Nagana Gowda, G. A.; Raftery, D. *Anal. Chem.* **2010**, 82(6), 2303-2309.

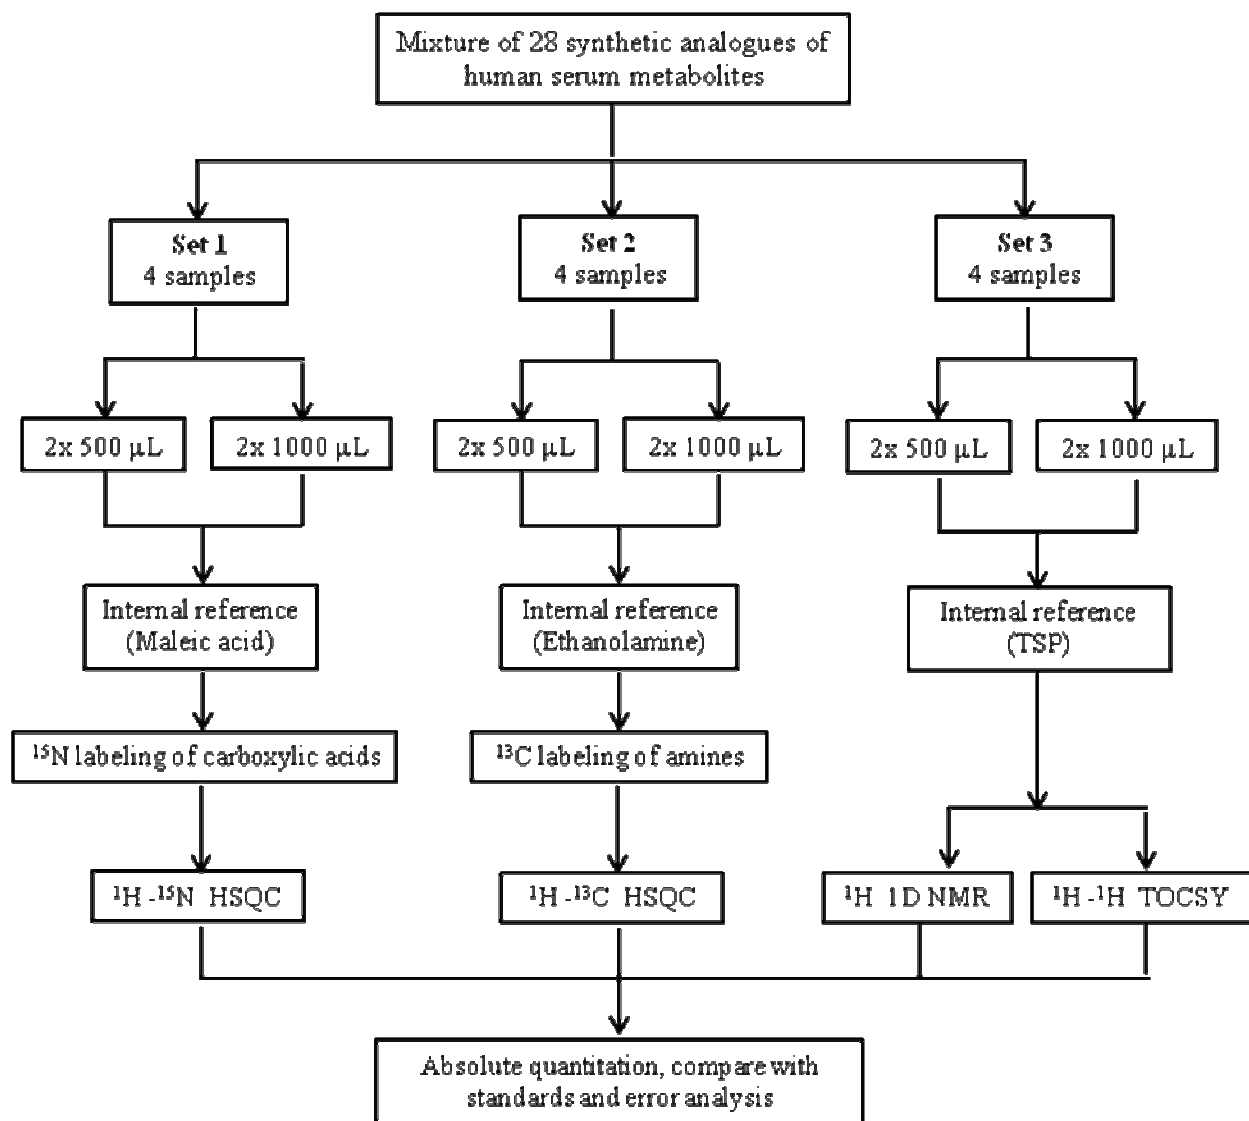

**Flow Diagram 1:** Flow chart depicting the steps followed in the analysis of the standard metabolite mixture using isotope enhanced NMR methods.

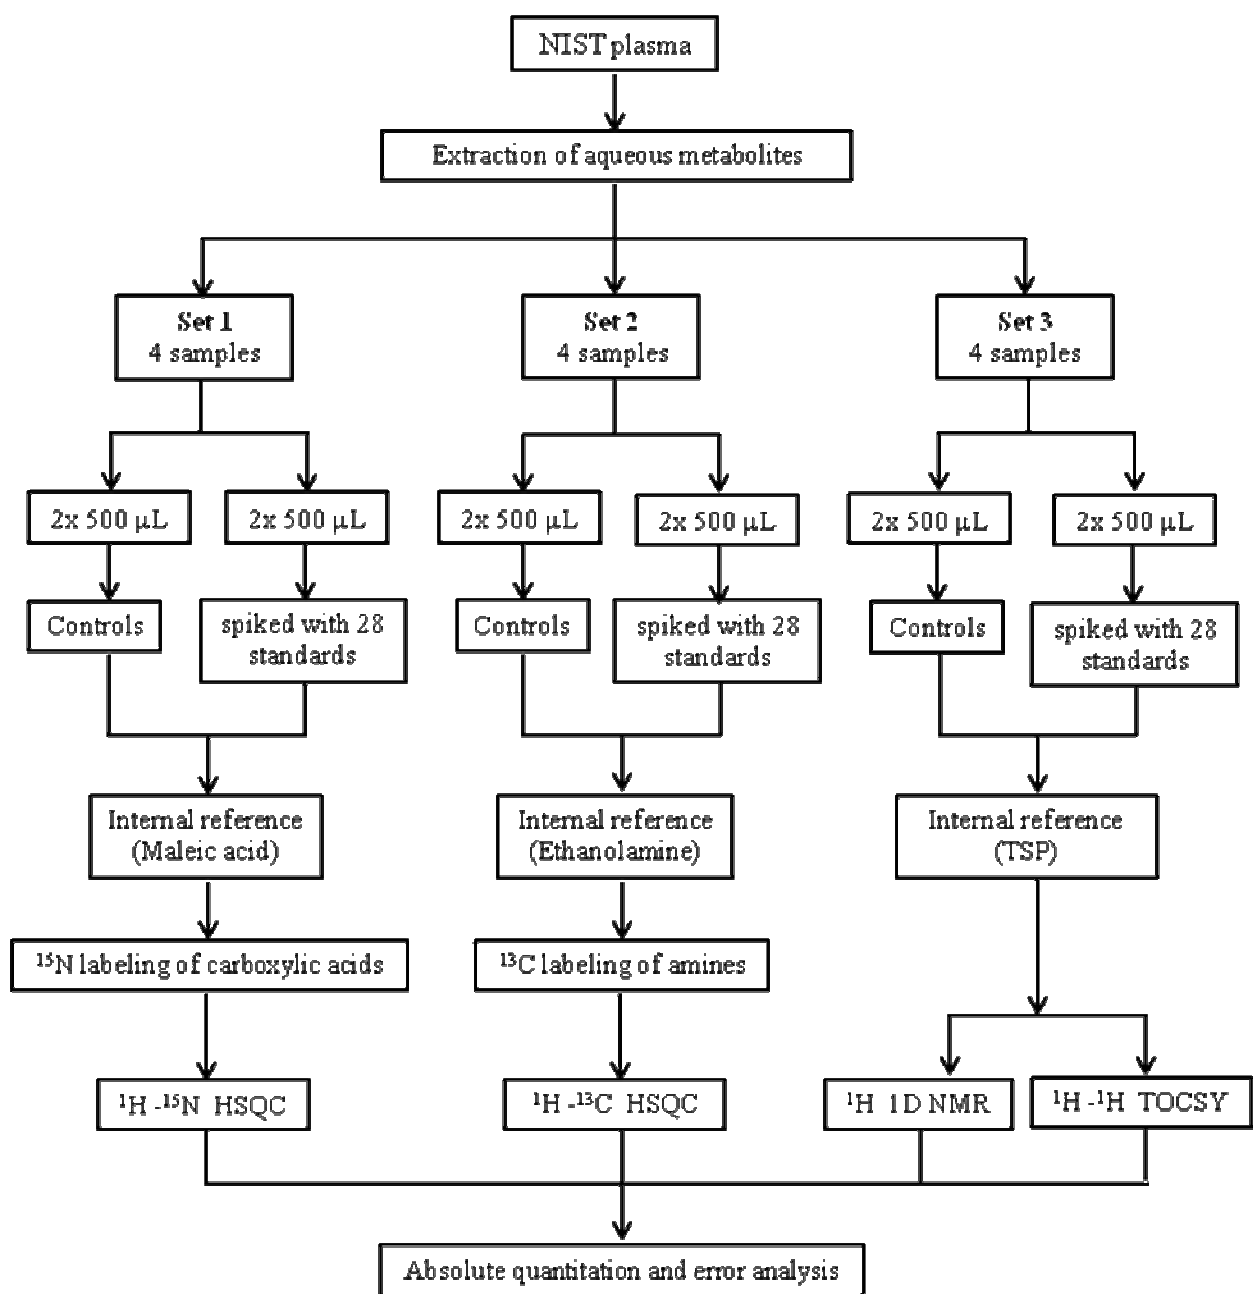

**Flow Diagram 2:** Flow chart depicting the steps followed in the analysis of metabolites in the NIST plasma sample using isotope enhanced NMR methods.

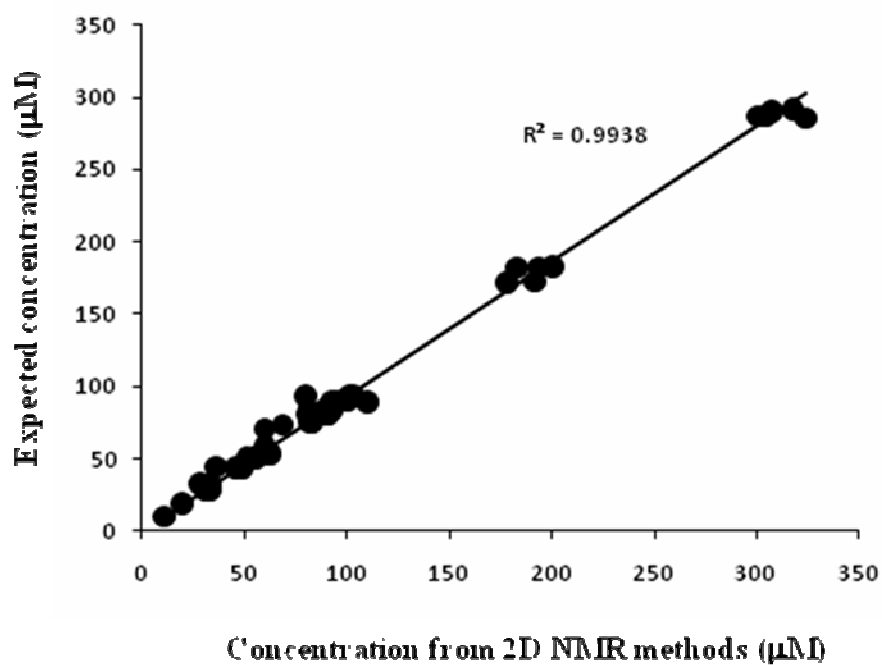

**Figure S1:** Correlation of the concentration of the metabolites determined by a combination 2D experiments with or without  $^{15}\text{N}$  or  $^{13}\text{C}$  tagging with the expected values.

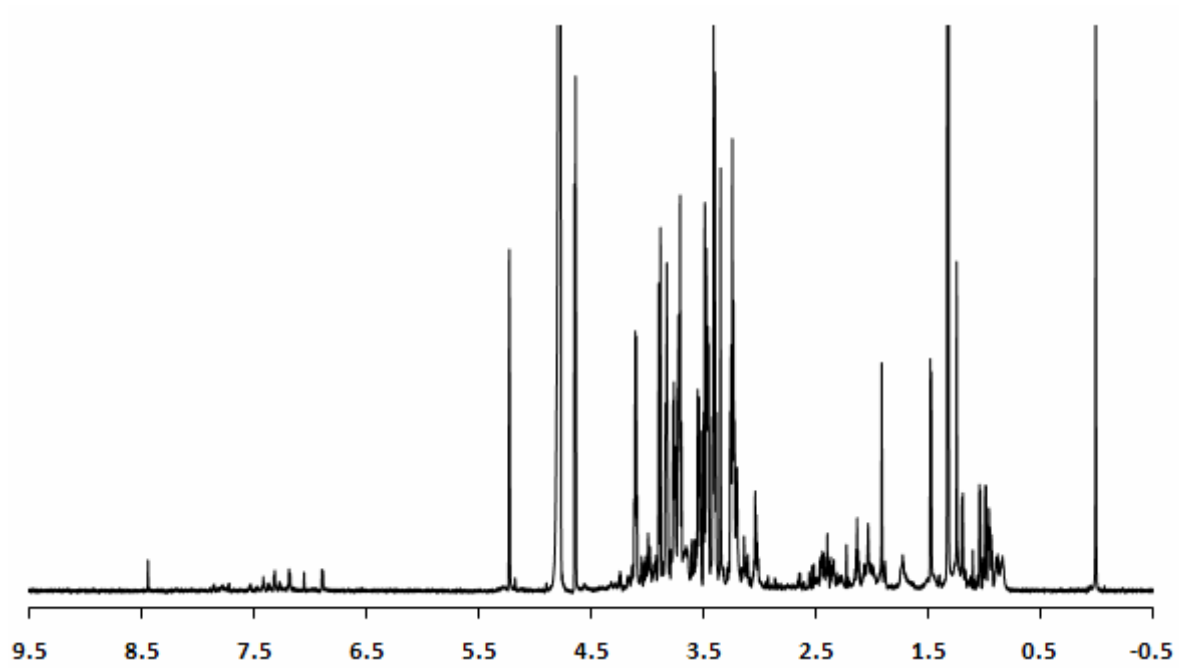

**Figure S2:** 1D  $^1\text{H}$  NMR spectrum of aqueous metabolites of NIST plasma obtained on a Bruker 500 MHz NMR spectrometer.

**Table S1:** Concentration of synthetic analogues of human plasma metabolites before and after calibration using  $^1\text{H}$  NMR.

| Serial Number | Compound          | Concentration from the weight (mM)* | Concentration after calibration by $^1\text{H}$ NMR (mM)* |
|---------------|-------------------|-------------------------------------|-----------------------------------------------------------|
| 1             | 3-Hydroxybutyrate | 20.02                               | 20.69 $\pm$ 0.32                                          |
| 2             | Acetate           | 19.62                               | 19.33 $\pm$ 0.30                                          |
| 3             | L-Alanine         | 19.67                               | 20.07 $\pm$ 0.31                                          |
| 4             | L-Arginine        | 20.00                               | 23.62 $\pm$ 0.37                                          |
| 5             | Citrate           | 20.09                               | 19.67 $\pm$ 0.31                                          |
| 6             | Creatinine        | 20.15                               | 16.18 $\pm$ 0.30                                          |
| 7             | Formate           | 20.38                               | 17.02 $\pm$ 0.26                                          |
| 8             | L-Glutamic acid   | 20.18                               | 22.39 $\pm$ 0.12                                          |
| 9             | L-Glutamine       | 20.15                               | 20.33 $\pm$ 0.19                                          |
| 10            | L-Glycine         | 20.58                               | 18.09 $\pm$ 0.28                                          |
| 11            | L-Histidine       | 20.10                               | 21.83 $\pm$ 0.17                                          |
| 12            | L-Isoleucine      | 20.24                               | 21.07 $\pm$ 0.09                                          |
| 13            | Lactate           | 20.21                               | 20.12 $\pm$ 0.31                                          |
| 14            | L-Leucine         | 20.37                               | 21.16 $\pm$ 0.33                                          |
| 15            | L-Lysine          | 20.11                               | 15.98 $\pm$ 0.49                                          |
| 16            | L-Methionine      | 19.95                               | 19.96 $\pm$ 0.03                                          |
| 17            | L-Phenylalanine   | 20.00                               | 21.29 $\pm$ 0.33                                          |
| 18            | L-Proline         | 20.16                               | 19.57 $\pm$ 0.31                                          |
| 19            | L-Threonine       | 19.98                               | 18.95 $\pm$ 0.41                                          |
| 20            | L-Tryptophan      | 20.00                               | 20.36 $\pm$ 0.32                                          |
| 21            | L-Tyrosine        | 19.87                               | 21.04 $\pm$ 0.08                                          |
| 22            | L-Valine          | 20.07                               | 19.10 $\pm$ 0.15                                          |
| 23            | Succinate         | 20.03                               | 20.77 $\pm$ 0.33                                          |
| 24            | Betaine           | 20.15                               | 18.69 $\pm$ 0.30                                          |
| 25            | 4-hydroxy-proline | 20.00                               | 22.39 $\pm$ 0.35                                          |
| 26            | L-Serine          | 19.98                               | 19.45 $\pm$ 0.14                                          |
| 27            | L-Asparagine      | 20.01                               | 23.01 $\pm$ 0.36                                          |
| 28            | Taurine           | 19.94                               | 19.17 $\pm$ 0.07                                          |
| 30            | Ethanolamine      | 20.00                               | 20.34 $\pm$ 0.95                                          |
| 31            | Maleic acid       | 20.07                               | 20.85 $\pm$ 0.31                                          |
| 32            | DSS               | 5.00                                | 4.70 $\pm$ 0.02                                           |

DSS: 4,4-dimethyl-4-silapentane-1-sulfonic acid; \* The errors are standard deviations based on two measurements.

**Table S2:** Synthetic analogues of human plasma metabolites grouped for concentration calibration using  $^1\text{H}$  NMR.

| <b>Group 1</b>    | <b>Group 2</b>    | <b>Group 3</b> | <b>Group 4</b>  | <b>Group 5</b> |
|-------------------|-------------------|----------------|-----------------|----------------|
| 3-Hydroxybutyrate | L-Arginine        | L-Glutamine    | Creatinine      | Succinate      |
| Acetate           | L-Histidine       | L-Isoleucine   | L-Glutamic acid | L-Serine       |
| L-Alanine         | Lactate           | L-Threonine    | L-Lysine        | Taurine        |
| Citrate           | L-Phenylalanine   | L-Tryptophan   | L-Methionine    |                |
| Formate           | L-Tyrosine        | Ethanolamine   | L-Proline       |                |
| L-Glycine         | L-Valine          |                |                 |                |
| L-Leucine         | 4-Hydroxy-proline |                |                 |                |
| Betaine           | maleic acid       |                |                 |                |
| L-Asparagine      |                   |                |                 |                |
